# Supplementary material for: Fabrication of superhydrophobic polycaprolactone/beeswax electrospun membranes for high-efficiency oil/water separation
Source: Royal Society of Chemistry journal article supplement (doi:10.1039/c6ra26123j), 2017-01-01
Supplement: c6ra26123j4.pdf [file c6ra26123j4.pdf]

## **SUPPORTING INFORMATION**

### **Fabrication of Superhydrophobic Polycaprolactone/Beeswax Electrospun Membranes for High-Efficiency Oil/Water Separation**

Reshmi .C .R, Suja P Sundaran, Juraij .A, Sujith Athiyanathil

---

<sup>a.</sup> *Materials Research Laboratory, Department of Chemistry, National Institute of Technology Calicut, Calicut-673601, Kerala, India, Fax +91 495 2287250, Tel +91 9846475675, E mail.: athiyanathil.sujith@gmail.com*

#### **S1 details of beeswax collection and extraction**

Collected beeswax from local apiculture field (Calicut, Kerala, India) specifically from *Apis cerana indica* bees colony. The beeswax has been collected from the honey chamber rather than brood chamber in order to get high purity beeswax. The wax has been cleaned off from the remaining honey and pollen-grains by melting in enough hot water to float the wax. Up on cooling the wax was removed and the process repeated two more times for further purification.

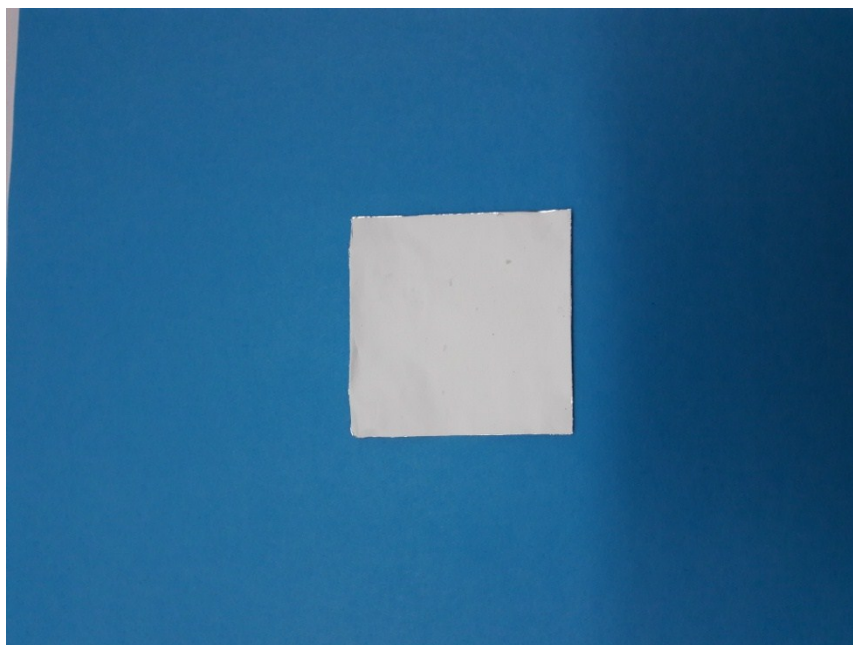

Figure S2: Photograph of prepared PCL-25BW membrane

### S3. Porosity and Pore-size

The porosity ( $\epsilon$ ) of electrospun nanofibrous membrane calculated using the following equation

$$\frac{\rho_0 - \rho}{\rho_0} \times 100$$

$\rho$  is the density of polymer raw material and the density of PCL is 1.145,  $\rho_0$  is the density of nanofibrous membrane. The density of electrospun nanofibrous membrane was calculated by determining the mass, thickness and area of electrospun mat. The thickness is calculated using a micrometer.

Mean pore radius ( $r$ ) of electrospun nanofibrous membrane was calculated using the following equation.

$$r = \frac{\sqrt{\Pi}}{4} \left( \frac{\Pi}{2 \log \left( \frac{1}{\epsilon} \right)} - 1 \right) d$$

$\epsilon$  is the porosity and  $d$  is the average fiber diameter of electrospun nanofibrous membrane.

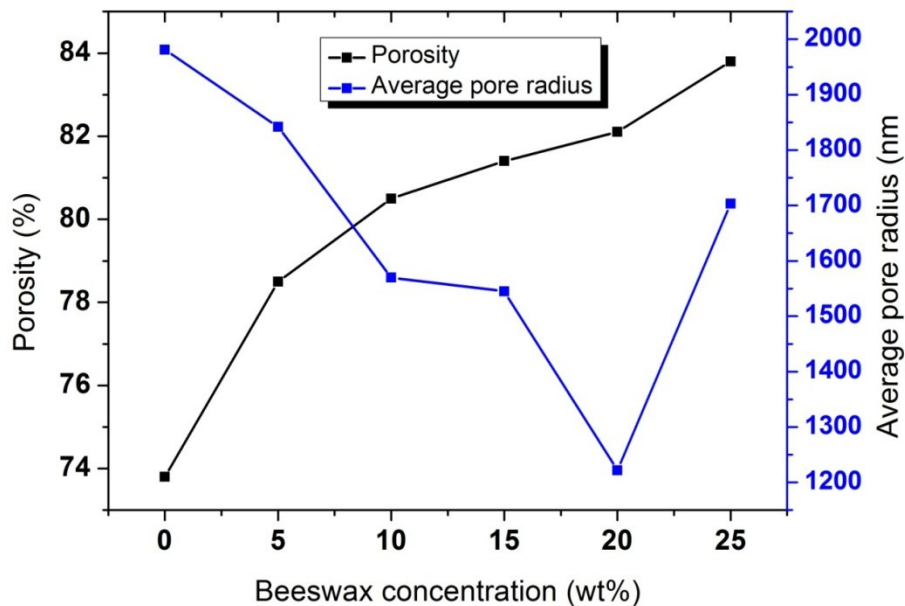

Fig. S3 Porosity and average pore size of different PCL/bees wax electrospun membranes.

Porosity and mean pore radius of electrospun PCL/BW nanofibrous membranes are represented in Fig. 1. Addition of 5 wt% to 25 wt% of BW to the PCL solution led to a gradual increase in porosity from 73.7 % to 83.8% in electrospun membranes. The porosity increases with decrease in average fiber diameter due to decrease in adhesion point between

the nanofibers. Mean pore radius of different PCL/BW electrospun fibers also been calculated.

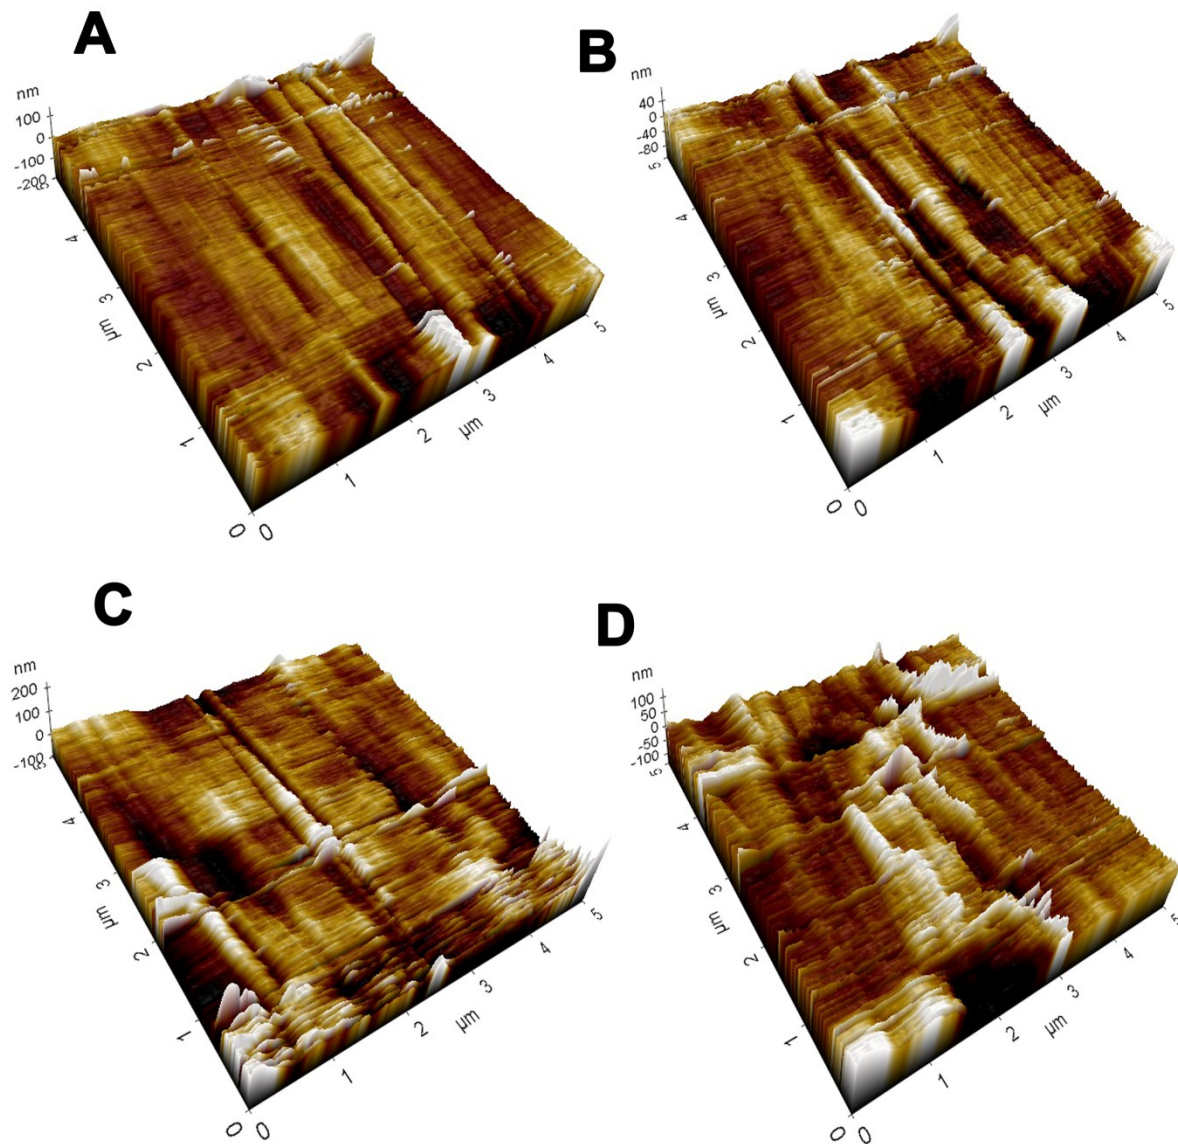

Fig. S4. AFM images of PCL/BW electrospun membranes (A) PCL-5BW, (B) PCL-10BW, (C) PCL-15BW, (D) PCL-20BW.

## S5. Surface free energy

The surface free energy of PCL/BW electrospun membrane has been calculated using Owens-Wendt method by considering both polar and dispersion component of surface energy of solid (ref.S1). Equation (1) and (2) used for calculating the dispersion and polar component. The two unknown quantities are measured by calculating contact angle of membrane with respect to two liquids. Here we are chosen water and glycerol as the two solvent for measuring contact angle. Surface tension values of water and glycerol are listed in Table 1.

$$(\gamma_s^d \gamma_{li}^d)^{0.5} + (\gamma_s^p \gamma_{li}^p)^{0.5} = 0.5 \gamma_{li} (1 + \cos \theta_i) \quad (1)$$

$$(\gamma_s^d \gamma_{lj}^d)^{0.5} + (\gamma_s^p \gamma_{lj}^p)^{0.5} = 0.5 \gamma_{lj} (1 + \cos \theta_j) \quad (2)$$

$\gamma_{li}^d$  and  $\gamma_{li}^p$  are the dispersion and polar components of surface tension of water.  $\gamma_{lj}^d$  and  $\gamma_{lj}^p$  are the dispersion and polar components of surface tension of glycerol.  $\gamma_s^d$  and  $\gamma_s^p$  are the dispersion and polar component of surface energy of electrospun membrane.

| Liquid      | $\gamma_l$ | $\gamma_l^d$ | $\gamma_l^p$ |
|-------------|------------|--------------|--------------|
| Water(i)    | 72.8       | 21.8         | 51           |
| Glycerol(j) | 63.4       | 37           | 26.4         |

## Results

Contact angle values of water and glycerol on electrospun PCL-BW membranes and surface energy values are listed in Table. 2.

| Sample   | Contact angle<br>value in water | Contact angle<br>value in glycerol | Surface energy |
|----------|---------------------------------|------------------------------------|----------------|
| PCL-5BW  | 132                             | 116                                | 8.57           |
| PCL-10BW | 133                             | 118                                | 7.42           |
| PCL-15BW | 141                             | 129                                | 3.59           |
| PCL-20BW | 148                             | 138                                | 1.57           |

|                 |     |     |      |
|-----------------|-----|-----|------|
| <b>PCL-25BW</b> | 153 | 143 | 1.29 |
|-----------------|-----|-----|------|

---

### **Reference**

S1. M. Żenkiewicz\* Methods for the calculation of surface free energy of solids Journal of Achievements in Materials and Manufacturing Engineering, 2007, 24, 137.
